# Supplementary material for: Silver chloride–poly-2-chlorobenzeneamine complex nanocomposite as photoelectrode for photoelectrochemical hydrogen gas generation from seawater
Source: Royal Society of Chemistry journal article supplement (doi:10.1039/d5ra03341a), 2025-01-01
Supplement: d5ra03341a1.pdf [file d5ra03341a1.pdf]

# Silver chloride-poly 2 chlorobenzeneamine complex nanocomposite as photoelectrode for photoelectrochemical hydrogen gas generation from seawater

Fahad Abdulaziz<sup>1</sup>, Mohamed Rabia<sup>2</sup>, Mohamed Zayed<sup>3\*</sup>, Salman Latif<sup>1</sup>, Yassin A. Jeilani<sup>1</sup>, Raja Rama Devi Patel<sup>4</sup>, Hussein A. Elsayed<sup>5</sup>, Ashour M. Ahmed<sup>6</sup>

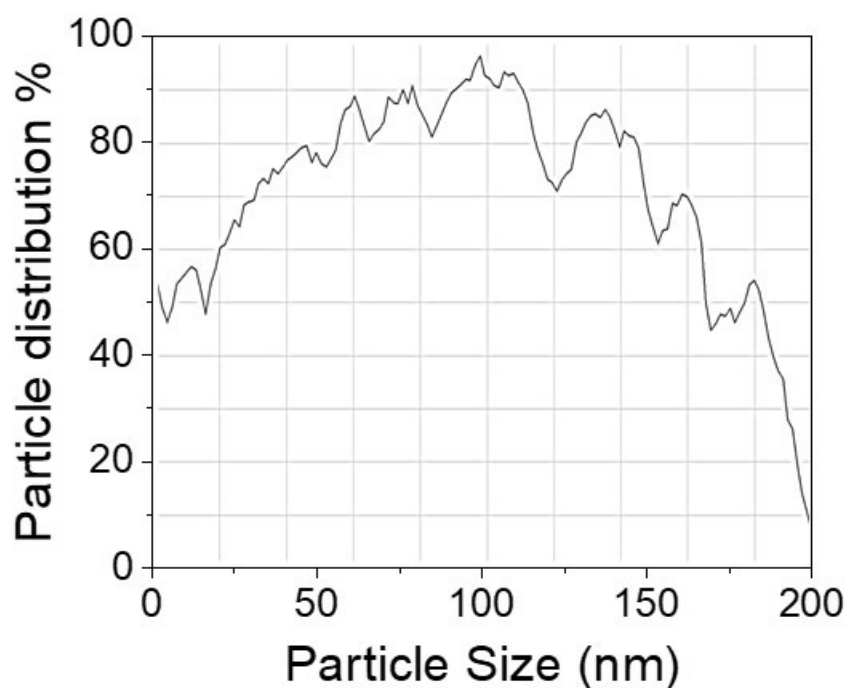

Figure S1. The particle distribution for the synthesized AgCl-P2CBA nanocomposite.

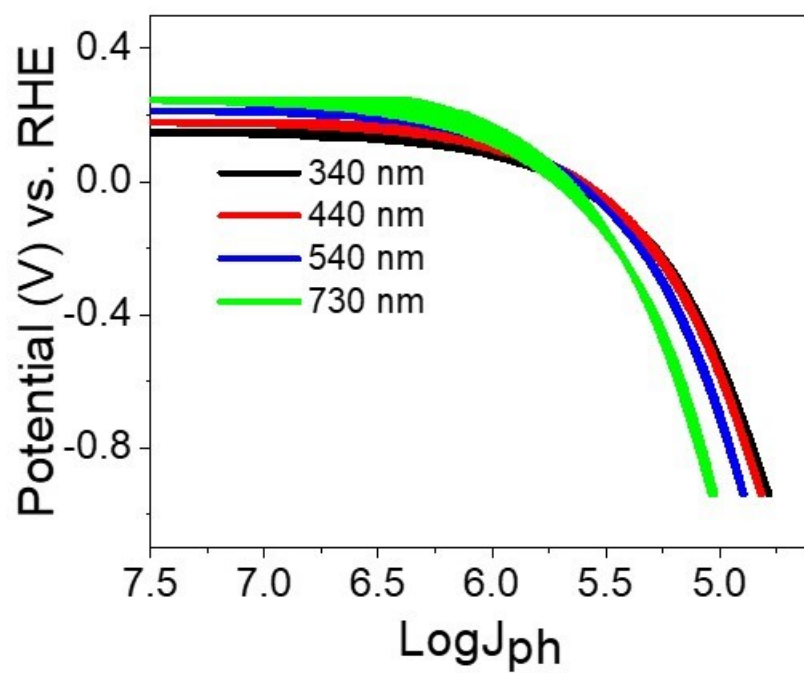

Figure S2. The Tafel plot for the fabricated P2CBA and AgCl-P2CBA for  $\text{H}_2$  gas generation from splitting Red Sea water under various light wavelengths.
